# Supplementary material
Source: PubMed Central journal article supplement (PMC7960410)
Supplement: 16-00899.pdf [file 16-00899.pdf]

## ON-LINE APPENDIX

### Materials and Methods

Of the 82 records retrieved, 28 were excluded for the following reasons: 1) They studied participants not infected with HIV<sup>1-4</sup>; 2) they were performed in animal models<sup>5-9</sup>; 3) they were review articles<sup>4,10-24</sup>; 4) they were case reports<sup>25,26</sup>; or 5) they examined participants with perinatal HIV exposure who were not infected.<sup>27</sup> Given the variability in the ROIs in which FA and MD were measured, we chose to focus on the corpus callosum because it is the largest WM fiber tract in the brain and was the most frequent measurement target. Of the 54 eligible full-text articles, 16 studies were included in the meta-analysis, with 12 studies reporting both FA and MD values and 4 studies reporting only FA values from HIV-infected patients and controls by using a cross-sectional design. While 3 of the aforementioned 12 studies did not include FA and MD values in the published article, the values were obtained from the corresponding authors. The remaining studies were excluded for the following reasons: 1) Numeric values for FA and MD were not reported for seropositive individuals or seronegative controls<sup>28-40</sup> (corresponding authors of these articles were contacted to obtain the values); 2) only whole-brain FA or MD or both were reported<sup>41-44</sup>; 3) the studies examined the relationships of clinical variables, biomarkers, or treatment on DTI parameters without including a seronegative control group<sup>45-51</sup>; 4) FA and MD were not measured in the corpus callosum<sup>38,52-54</sup>; 5) they used prior published DTI data to determine selection of ROIs for fMRI connectivity analysis<sup>55</sup>; 6) they reported results of a single case-control pair using a new glyph design<sup>56</sup>; 7) the study focused on imaging measures other than diffusion parameters<sup>57-62</sup>; or 8) they reported a new processing algorithm that was applied to the DTI data.<sup>63</sup>

In addition, interpretation of many of these studies was confounded by reporting of mixed cohorts of treated and untreated participants with HIV infection<sup>30,32-34,36-38,45,47,64,65</sup> or participants with HIV infection treated solely with cART.<sup>39,42,44,66</sup>

### Results

**Callosal Regional Heterogeneity in WM Measures.** The observed between-study heterogeneity in mean callosal FA and MD group differences might also have resulted from sampling of different callosal segments in the included studies. To more closely examine regional variations in callosal FA and MD related to serostatus, we used repeated-measures multilevel models with region and serostatus as fixed effects and study as a random effect in the 8 studies providing all 4 diffusion measures for 3 callosal subregions. For this analysis, comparison data from the present study were included in the meta-analysis. For FA, we found no effect of serostatus [ $F(1,26) = 1.36, P = .25$ ], but a significant effect of region [ $F(2,26) = 51.9, P < .001$ ], with the splenium having higher FA than the body. For MD, we found a significant effect of serostatus [ $F(1,26) = 6.51, P = .017$ ], with the HIV-positive group having higher MD and a significant effect of region [ $F(2,26) = 4.06, P = .029$ ], with the splenium having the lowest MD. For RD, we found significant effects of serostatus [ $F(1,26) = 4.35, P = .047$ ] and region [ $F(2,26) = 8.58, P < .0014$ ], with the splenium having the lowest RD. For AD, we found a significant

effect of serostatus [ $F(1,26) = 5.55, P = .026$ ], with the HIV-positive group exhibiting overall higher AD, and no effect of region [ $F(2,26) = 0.30, P < .97$ ]. Thus, the callosal region selected for sampling appears to have a strong effect on group estimates of WM microstructure.

### REFERENCES

1. Lin WC, Chen PC, Wang HC, et al. **Diffusion tensor imaging study of white matter damage in chronic meningitis.** *PLoS One* 2014;9:e98210 CrossRef Medline
2. Bladowska J, Zimny A, Knysz B, et al. **Evaluation of early cerebral metabolic, perfusion and microstructural changes in HCV-positive patients: a pilot study.** *J Hepatol* 2013;59:651-57 CrossRef Medline
3. Cysique LA, Brew BJ. **Prevalence of non-confounded HIV-associated neurocognitive impairment in the context of plasma HIV RNA suppression.** *J Neurovirol* 2011;17:176-83 CrossRef Medline
4. Matsui N, Nakane S, Harada M, et al. **Neuroradiological study of a possible progressive multifocal leukoencephalopathy using diffusion tensor imaging and proton magnetic resonance spectroscopy [in Japanese].** *Rinsho Shinkeigaku* 2006;46:555-60 Medline
5. Carey AN, Liu X, Mintzopoulos D, et al. **Conditional Tat protein brain expression in the GT-tg bigenic mouse induces cerebral fractional anisotropy abnormalities.** *Curr HIV Res* 2015;13:3-9 Medline
6. Lentz MR, Peterson KL, Ibrahim WG, et al. **Diffusion tensor and volumetric magnetic resonance measures as biomarkers of brain damage in a small animal model of HIV.** *PLoS One* 2014;9:e105752 CrossRef Medline
7. Boska MD, Dash PK, Knibbe J, et al. **Associations between brain microstructures, metabolites, and cognitive deficits during chronic HIV-1 infection of humanized mice.** *Mol Neurodegener* 2014;9:1-18 CrossRef Medline
8. Li C, Zhang X, Komery A, et al. **Longitudinal diffusion tensor imaging and perfusion MRI investigation in a macaque model of neuro-AIDS: a preliminary study.** *Neuroimage* 2011;58:286-92 CrossRef Medline
9. Dash PK, Gorantla S, Gendelman HE, et al. **Loss of neuronal integrity during progressive HIV-1 infection of humanized mice.** *J Neurosci* 2011;31:3148-57 CrossRef Medline
10. Thompson PM, Jahanshad N. **Novel neuroimaging methods to understand how HIV affects the brain.** *Curr HIV/AIDS Rep* 2015;12:289-98 CrossRef Medline
11. Ances BM, Hammoud DA. **Neuroimaging of HIV-associated neurocognitive disorders (HAND).** *Curr Opin HIV AIDS* 2014;9:545-51 CrossRef Medline
12. Masters MC, Ances BM. **Role of neuroimaging in HIV-associated neurocognitive disorders.** *Semin Neurol* 2014;34:89-102 CrossRef Medline
13. Zhang X, Li C. **Quantitative MRI measures in SIV-infected macaque brains.** *J Clin Cell Immunol* 2013;Suppl 7. pii: 005 Medline
14. Holt JL, Kraft-Terry SD, Chang L. **Neuroimaging studies of the aging HIV-1-infected brain.** *J Neurovirol* 2012;18:291-302 CrossRef Medline
15. Sahraian M, Radue EW, Eshaghi A, et al. **Progressive multifocal leukoencephalopathy: a review of the neuroimaging features and differential diagnosis.** *Eur J Neurol* 2012;19:1060-69 CrossRef Medline
16. Rosenbloom MJ, Sullivan EV, Pfefferbaum A. **Focus on the brain: HIV infection and alcoholism—comorbidity effects on brain structure and function.** *Alcohol Res Health* 2010;33:247-57 Medline Medline
17. Tucker KA, Robertson KR, Lin W, et al. **Neuroimaging in human immunodeficiency virus infection.** *J Neuroimmunol* 2004;157:153-62 CrossRef Medline
18. Letendre S, Ances B, Gibson S, et al. **Neurologic complications of HIV disease and their treatment.** *Top HIV Med* 2007;15:32-39 Medline
19. Kuroda Y, Kosugi M. **Clinical characteristics, diagnostic criteria and treatment of progressive multifocal leukoencephalopathy [in Japanese].** *Nihon Rinsho* 2007;65:1501-05 Medline

20. Thompson PM, Hayashi KM, Dutton RA, et al. **Tracking Alzheimer's disease.** *Ann N Y Acad Sci* 2007;1097:183–214 CrossRef Medline
21. Pfefferbaum A, Rosenbloom M, Sullivan EV. **Alcoholism and AIDS: magnetic resonance imaging approaches for detecting interactive neuropathology.** *Alcohol Clin Exp Res* 2002;26:1031–46 CrossRef Medline
22. Horsfield MA, Jones DK. **Applications of diffusion-weighted and diffusion tensor MRI to white matter diseases: a review.** *NMR Biomed* 2002;15:570–77 CrossRef Medline
23. Lim KO, Helpert JA. **Neuropsychiatric applications of DTI: a review.** *NMR Biomed* 2002;15:587–93 CrossRef Medline
24. Sullivan EV, Pfefferbaum A. **Diffusion tensor imaging in normal aging and neuropsychiatric disorders.** *Eur J Radiol* 2003;45:244–55 CrossRef Medline
25. Paul RH, Laidlaw DH, Tate DF, et al. **Neuropsychological and neuroimaging outcome of HIV-associated progressive multifocal leukoencephalopathy in the era of antiretroviral therapy.** *J Integr Neurosci* 2007;6:191–203 CrossRef Medline
26. Huisman TA, Boltshauser E, Martin E, et al. **Diffusion tensor imaging in progressive multifocal leukoencephalopathy: early predictor for demyelination?** *AJNR Am J Neuroradiol* 2005;26:2153–56 Medline
27. Jahanshad N, Couture MC, Prasitsuebsai W, et al. **Brain imaging and neurodevelopment in HIV-uninfected Thai children born to HIV-infected mothers.** *Pediatr Infect Dis J* 2015;34:e211–16 CrossRef Medline
28. Chen Y, An H, Zhu H, et al. **White matter abnormalities revealed by diffusion tensor imaging in non-demented and demented HIV+ patients.** *Neuroimage* 2009;47:1154–62 CrossRef Medline
29. Cloak CC, Chang L, Ernst T. **Increased frontal white matter diffusion is associated with glial metabolites and psychomotor slowing in HIV.** *J Neuroimmunol* 2004;157:147–52 CrossRef Medline
30. Gongvatana A, Schweinsburg BC, Taylor MJ, et al; Charter Group. **White matter tract injury and cognitive impairment in human immunodeficiency virus-infected individuals.** *J Neurovirol* 2009;15:187–95 CrossRef Medline
31. Hoare J, Jacqueline H, Westgarth-Taylor J, et al. **A diffusion tensor imaging and neuropsychological study of prospective memory impairment in South African HIV positive individuals.** *Metab Brain Dis* 2012;27:289–97 CrossRef Medline
32. Müller-Oehring EM, Schulte T, Rosenbloom MJ, et al. **Callosal degradation in HIV-1 infection predicts hierarchical perception: a DTI study.** *Neuropsychologia* 2010;48:1133–43 CrossRef Medline
33. Nir TM, Jahanshad N, Busovaca E, et al. **Mapping white matter integrity in elderly people with HIV.** *Hum Brain Mapp* 2014;35:975–92 CrossRef Medline
34. Pfefferbaum A, Rosenbloom MJ, Rohlfing T, et al. **Frontostriatal fiber bundle compromise in HIV infection without dementia.** *AIDS* 2009;23:1977–85 CrossRef Medline
35. Schulte T, Müller-Oehring EM, Javitz H, et al. **Callosal compromise differentially affects conflict processing and attentional allocation in alcoholism, HIV, and their comorbidity.** *Brain Imaging Behav* 2008;2:27–38 CrossRef Medline
36. Schulte T, Müller-Oehring E, Sullivan EV, et al. **White matter fiber compromise contributes differentially to attention and emotion processing impairment in alcoholism, HIV-infection, and their comorbidity.** *Neuropsychologia* 2012;50:2812–22 CrossRef Medline
37. Stebbins GT, Smith CA, Bartt RE, et al. **HIV-associated alterations in normal-appearing white matter: a voxel-wise diffusion tensor imaging study.** *J Acquir Immune Defic Syndr* 2007;46:564–73 CrossRef Medline
38. Sullivan EV, Rosenbloom MJ, Rohlfing T, et al. **Pontocerebellar contribution to postural instability and psychomotor slowing in HIV infection without dementia.** *Brain Imaging Behav* 2011;5:12–24 CrossRef Medline
39. Towgood KJ, Pitkanen M, Kulasegaram R, et al. **Mapping the brain in younger and older asymptomatic HIV-1 men: frontal volume changes in the absence of other cortical or diffusion tensor abnormalities.** *Cortex* 2012;48:230–41 CrossRef Medline
40. Wu Y, Storey P, Cohen BA, et al. **Diffusion alterations in corpus callosum of patients with HIV.** *AJNR Am J Neuroradiol* 2006;27:656–60 Medline
41. Du H, Wu Y, Ochs R, et al. **A comparative evaluation of quantitative neuroimaging measurements of brain status in HIV infection.** *Psychiatry Res* 2012;203:95–99 CrossRef Medline
42. Ragin AB, Storey P, Cohen BA, et al. **Whole brain diffusion tensor imaging in HIV-associated cognitive impairment.** *AJNR Am J Neuroradiol* 2004;25:195–200 Medline
43. Ragin A, Storey P, Cohen B, et al. **Disease burden in HIV-associated cognitive impairment: a study of whole-brain imaging measures.** *Neurology* 2004;63:2293–97 CrossRef Medline
44. Tate DF, Conley J, Paul RH, et al. **Quantitative diffusion tensor imaging tractography metrics are associated with cognitive performance among HIV-infected patients.** *Brain Imaging Behav* 2010;4:68–79 CrossRef Medline
45. Gongvatana A, Cohen RA, Correia S, et al. **Clinical contributors to cerebral white matter integrity in HIV-infected individuals.** *J Neurovirol* 2011;17:477–86 CrossRef Medline
46. Hoare J, Fouche JP, Phillips N, et al. **Clinical associations of white matter damage in cART-treated HIV-positive children in South Africa.** *J Neurovirol* 2015;21:120–28 CrossRef Medline
47. Nakamoto BK, Jahanshad N, McMurtray A, et al. **Cerebrovascular risk factors and brain microstructural abnormalities on diffusion tensor images in HIV-infected individuals.** *J Neurovirol* 2012;18:303–12 CrossRef Medline
48. Ragin AB, Wu Y, Ochs R, et al. **Biomarkers of neurological status in HIV infection: a 3-year study.** *Proteomics Clin Appl* 2010;4:295–303 CrossRef Medline
49. Ragin AB, Wu Y, Ochs R, et al. **Serum matrix metalloproteinase levels correlate with brain injury in human immunodeficiency virus infection.** *J Neurovirol* 2009;15:275–81 CrossRef Medline
50. Schifitto G, Zhong J, Gill D, et al. **Lithium therapy for human immunodeficiency virus type 1-associated neurocognitive impairment.** *J Neurovirol* 2009;15:176–86 CrossRef Medline
51. Ragin AB, Wu Y, Storey P, et al. **Monocyte chemoattractant protein-1 correlates with subcortical brain injury in HIV infection.** *Neurology* 2006;66:1255–57 CrossRef Medline
52. Ragin AB, Wu Y, Storey P, et al. **Diffusion tensor imaging of subcortical brain injury in patients infected with human immunodeficiency virus.** *J Neurovirol* 2005;11:292–98 CrossRef Medline
53. Uban KA, Herting MM, Williams PL, et al; Pediatric HIV/AIDS Cohort and the Pediatric Imaging, Neurocognition, and Genetics Studies. **White matter microstructure among youth with perinatally acquired HIV is associated with disease severity.** *AIDS* 2015;29:1035–44 CrossRef Medline
54. Bernard C, Dilharreguy B, Allard M, et al; ANRS CO3 Aquitaine cohort study group. **Muscular weakness in individuals with HIV associated with a disorganization of the cortico-spinal tract: a multi-modal MRI investigation.** *PLoS One* 2013;8:e66810 CrossRef Medline
55. Tivarus ME, Pester B, Schmidt C, et al. **Are structural changes induced by lithium in the HIV brain accompanied by changes in functional connectivity?** *PLoS One* 2015;10:e0139118 CrossRef Medline
56. Zhang C, Schultz T, Lawonn K, et al. **Glyph-based comparative visualization for diffusion tensor fields.** *EEE Trans Vis Comput Graph* 2016;22:797–806 CrossRef Medline
57. Jahanshad N, Valcour VG, Nir TM, et al. **Disrupted brain networks in the aging HIV+ population.** *Brain Connect* 2012;2:335–44 CrossRef Medline
58. Wang Y, Zhang J, Gutman B, et al. **Multivariate tensor-based morphometry on surfaces: application to mapping ventricular abnormalities in HIV/AIDS.** *Neuroimage* 2010;49:2141–57 CrossRef Medline
59. Lepore N, Brun CA, Chiang MC, et al. **Multivariate statistics of the Jacobian matrices in tensor based morphometry and their application to HIV/AIDS.** *Med Image Comput Comput Assist Interv* 2006; 2(pt 1):191–98 Medline
60. Lepore N, Brun C, Pennec X, et al. **Mean template for tensor-based morphometry using deformation tensors.** *Med Image Comput Comput Assist Interv* 2007;10(pt 2):826–33 Medline

61. Clark CA, Barrick TR, Murphy MM, et al. **White matter fiber tracking in patients with space-occupying lesions of the brain: a new technique for neurosurgical planning?** *Neuroimage* 2003;20:1601–08 CrossRef Medline
62. Kalpana R, Muttan S, Kumarasamy N. **Virus infection on brain white matter: statistical analysis of DT MRI scans.** *Int J Bioinform Res Appl* 2011;7:273–86 CrossRef Medline
63. Goldsmith J, Caffo B, Crainiceanu C, et al. **Nonlinear tube-fitting for the analysis of anatomical and functional structures.** *Ann Appl Stat* 2011;5:337–63 CrossRef Medline
64. Ragin AB, Wu Y, Gao Y, et al. **Brain alterations within the first 100 days of HIV infection.** *Ann Clin Transl Neurol* 2015;2:12–21 CrossRef Medline
65. Wang B, Liu Z, Liu J, et al. **Gray and white matter alterations in early HIV-infected patients: combined voxel-based morphometry and tract-based spatial statistics.** *J Magn Reson Imaging* 2016;43:1474–83 CrossRef Medline
66. Zhu T, Zhong J, Hu R, et al. **Patterns of white matter injury in HIV infection after partial immune reconstitution: a DTI tract-based spatial statistics study.** *J Neurovirol* 2013;19:10–23 CrossRef Medline

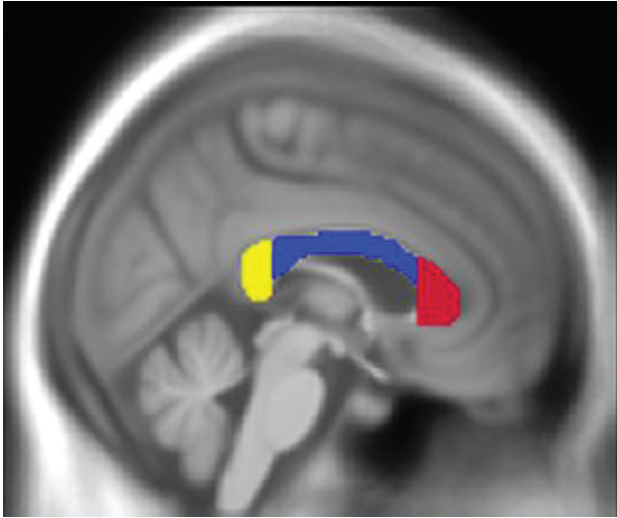

**ON-LINE FIG 1.** Callosal subregions sampled in the comparison study, with the genu shown in red, the body in blue, and the splenium in yellow.

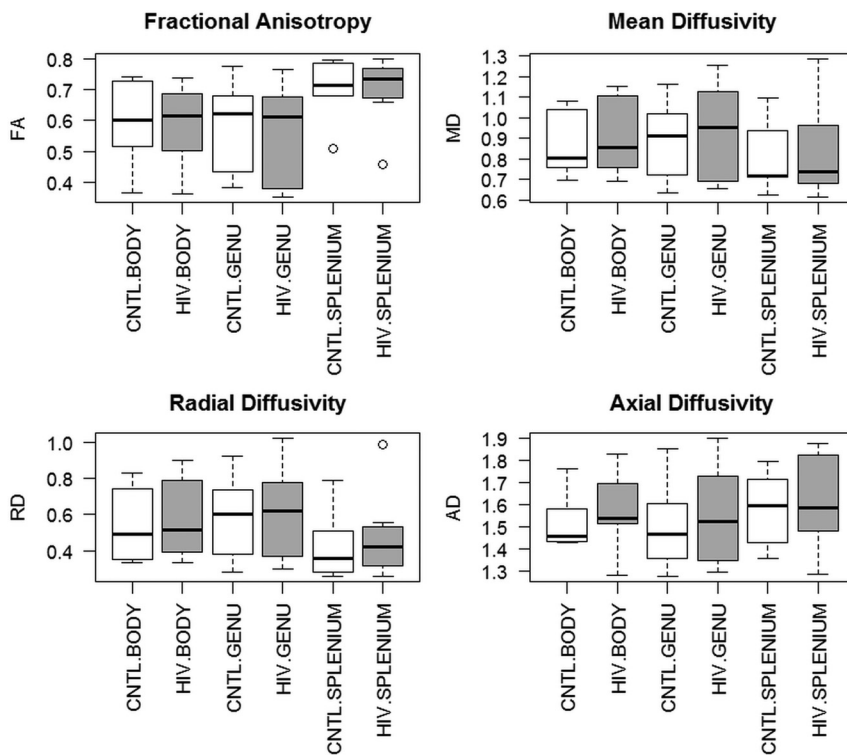

**ON-LINE FIG 2.** Boxplots of FA, MD, RD, and AD values for midline corpus callosum regions (body, genu, and splenium) for both seropositive (HIV) and seronegative (CNTL) participants. Results are aggregated from the 8 studies reporting callosal subregions. For both groups, diffusivity differs across callosal subregions.

**On-line Table 1: Variation in technical parameters of DTI studies performed in HIV-infected subjects**

| Study                                   | DTI Processing Program                 | Field Strength (T) | Gradient Directions | Voxel Dimensions (mm) |
|-----------------------------------------|----------------------------------------|--------------------|---------------------|-----------------------|
| Seider et al, 2016 <sup>35</sup>        | FSL                                    | 3                  | 64                  | 1.77 × 1.77 × 1.8     |
| Wright et al, 2015 <sup>32</sup>        | Custom software                        | 4                  | 6                   | 2.0 × 2.0 × 3.0       |
| Tang et al, 2015 <sup>59</sup>          | FSL                                    | 3                  | 16                  | 2.0 × 0.875 × 0.875   |
| Ragin et al, 2015 <sup>24</sup>         | SIENAX <sup>a</sup>                    | 3                  | 64                  | 2.0 × 2.0 × 2.0       |
| Kamat et al, 2014 <sup>25</sup>         | FSL                                    | 1.5                | 51                  | 2.5 × 2.5 × 2.5       |
| Leite et al, 2013 <sup>23</sup>         | FSL                                    | 1.5                | 30                  | 2.10 × 2.13 × 2.10    |
| Zhu et al, 2013 <sup>26</sup>           | FSL                                    | 1.5                | 21                  | 2.0 × 2.0 × 5.0       |
| Stubbe-Drager et al, 2012 <sup>27</sup> | Münster Neuroimaging Evaluation System | 3                  | 20                  | 1.8 × 1.8 × 3.6       |
| Wright et al, 2012 <sup>34</sup>        | Custom software                        | 3                  | 23                  | 2.0 × 2.0 × 2.0       |
| Hoare et al, 2011 <sup>28</sup>         | FSL                                    | 3                  | 30                  | 2.0 × 2.0 × 2.2       |
| Chang et al, 2008 <sup>33</sup>         | DTIStudio, Version 2.03 <sup>b</sup>   | 3                  | 12                  | 1.7 × 1.7 × 4.0       |
| Pfefferbaum et al, 2007 <sup>29</sup>   | FSL                                    | 1.5                | 6                   | 1.88 × 1.88 × 4.0     |
| Wu et al, 2006 <sup>40</sup>            | DPTTools <sup>c</sup>                  | 1.5                | 6                   | 1.875 × 1.875 × 7     |
| Thurnher et al, 2005 <sup>21</sup>      | ?                                      | 1.5                | 7                   | 1.80 × 1.80 × 5.0     |
| Pomara et al, 2001 <sup>30</sup>        | ?                                      | 1.5                | 6                   | 1.875 × 1.875 × 5.0   |
| Filippi et al, 2001 <sup>31</sup>       | ?                                      | 1.5                | 7                   | 1.72 × 1.72 × 5.0     |

**Note:**—? indicates unknown.

<sup>a</sup> FSL SIENAX (<http://fsl.fmrib.ox.ac.uk/fsl/fslwiki/SIENAX>).

<sup>b</sup> Johns Hopkins University, Baltimore, Maryland.

<sup>c</sup> INFORMAG, Paris, France.

**On-line Table 2: Regional variation in diffusion measures in the corpus callosum in 4 studies**

| Treatment Status | O'Connor et al, 2017<br>(current study) cART | Seider et al, 2016 <sup>35</sup><br>Mixed | Wright et al, 2015 <sup>32</sup><br>cART-, cART-infected <1 yr, >1 yr | Tang et al, 2015 <sup>59</sup><br>Mixed |
|------------------|----------------------------------------------|-------------------------------------------|-----------------------------------------------------------------------|-----------------------------------------|
| FA CNTL          |                                              |                                           |                                                                       |                                         |
| Genu             | .686 (.026)                                  | .719 (.049)                               | .622 (.036)                                                           | .384 (.025)                             |
| Body             | .595 (.047)                                  | .726 (.043)                               | .517 (.041)                                                           |                                         |
| Splenium         | .736 (.031)                                  | .785 (.037)                               | .679 (.056)                                                           |                                         |
| FA HIV+          |                                              |                                           |                                                                       |                                         |
| Genu             | .720 (.048)                                  | .730 (.057)                               | .610 (.035) .552 (.072)                                               | .352 (.029)                             |
| Body             | .678 (.055)                                  | .738 (.064)                               | .513 (.056) .493 (.078)                                               |                                         |
| Splenium         | .775 (.029)                                  | .797 (.050)                               | .683 (.046) .660 (.040)                                               |                                         |
| MD CNTL          |                                              |                                           |                                                                       |                                         |
| Genu             | .713 (.020)                                  | .637 (.069)                               | 1.017 (.056)                                                          | .910 (.054)                             |
| Body             | .815 (.031)                                  | .698 (.084)                               | 1.081 (.083)                                                          |                                         |
| Splenium         | .744 (.032)                                  | .626 (.053)                               | .938 (.098)                                                           |                                         |
| MD HIV+          |                                              |                                           |                                                                       |                                         |
| Genu             | .694 (.053)                                  | .655 (.083)                               | 1.025 (.066) 1.129 (.160)                                             | .951 (.039)                             |
| Body             | .765 (.056)                                  | .725 (.095)                               | 1.103 (.157) 1.153 (.170)                                             |                                         |
| Splenium         | .708 (.036)                                  | .647 (.068)                               | .946 (.085) .981 (.104)                                               |                                         |
| AD CNTL          |                                              |                                           |                                                                       |                                         |
| Genu             | 1.399 (.036)                                 | 1.274 (.169)                              | 1.853 (.089)                                                          | 1.283 (.071)                            |
| Body             | 1.452 (.079)                                 | 1.427 (.205)                              | 1.762 (.021)                                                          |                                         |
| Splenium         | 1.541 (.043)                                 | 1.358 (.150)                              | 1.794 (.122)                                                          |                                         |
| AD HIV+          |                                              |                                           |                                                                       |                                         |
| Genu             | 1.407 (.063)                                 | 1.345 (.174)                              | 1.840 (.097) 1.899 (.157)                                             | 1.301 (.047)                            |
| Body             | 1.483 (.047)                                 | 1.508 (.211)                              | 1.783 (.167) 1.829 (.170)                                             |                                         |
| Splenium         | 1.535 (.050)                                 | 1.427 (.156)                              | 1.814 (.131) 1.831 (.170)                                             |                                         |
| RD CNTL          |                                              |                                           |                                                                       |                                         |
| Genu             | .370 (.031)                                  | .319 (.041)                               | .600 (.059)                                                           | .723 (.052)                             |
| Body             | .406 (.076)                                  | .333 (.046)                               | .741 (.091)                                                           |                                         |
| Splenium         | .346 (.041)                                  | .260 (.029)                               | .510 (.106)                                                           |                                         |
| RD HIV+          |                                              |                                           |                                                                       |                                         |
| Genu             | .337 (.061)                                  | .317 (.069)                               | .617 (.066) .744 (.177)                                               | .775 (.046)                             |
| Body             | .406 (.076)                                  | .333 (.079)                               | .763 (.159) .815 (.184)                                               |                                         |
| Splenium         | .294 (.041)                                  | .257 (.060)                               | .512 (.086) .556 (.085)                                               |                                         |

**Note:**— HIV+ indicates seropositive; CNTL, seronegative participants; cART-, seropositives not taking cART.



**On-line Table 3: Regional variation in diffusion measures in the corpus callosum in 5 studies**

| Treatment Status of HIV+ | Kamat et al, 2014 <sup>25</sup><br>Mixed | Leite et al, 2013 <sup>23</sup><br>Mixed | Zhu et al, 2013 <sup>26</sup><br>Mixed | Wright et al, 2012 <sup>34</sup><br>cART+ | Wright et al, 2012 <sup>34</sup><br>cART- |
|--------------------------|------------------------------------------|------------------------------------------|----------------------------------------|-------------------------------------------|-------------------------------------------|
| FA CNTL                  |                                          |                                          |                                        |                                           |                                           |
| Genu                     | .47 (.09)                                | .775 (.0626)                             | .396 (.205)                            | .6373 (.125)                              | .637 (.125)                               |
| Body                     |                                          | .739 (.0298)                             | .367 (.153)                            | .6013 (.103)                              | .601 (.103)                               |
| Splenium                 |                                          | .796 (.0198)                             | .509 (.225)                            | .7128 (.098)                              | .713 (.098)                               |
| FA HIV+                  |                                          |                                          |                                        |                                           |                                           |
| Genu                     | .38 (.11)                                | .764 (.632)                              | .379 (.195)                            | .625 (.095)                               | .676 (.056)                               |
| Body                     |                                          | .721 (.629)                              | .361 (.152)                            | .614 (.088)                               | .649 (.060)                               |
| Splenium                 |                                          | .792 (.617)                              | .457 (.223)                            | .735 (.061)                               | .745 (.042)                               |
| MD CNTL                  |                                          |                                          |                                        |                                           |                                           |
| Genu                     | 1.02 (.28)                               | .678 (.035)                              | 1.165 (.539)                           | .766 (.087)                               | .766 (.087)                               |
| Body                     |                                          | .760 (.025)                              | 1.038 (.390)                           | .806 (.097)                               | .806 (.097)                               |
| Splenium                 |                                          | .717 (.023)                              | 1.096 (.572)                           | .713 (.096)                               | .713 (.096)                               |
| MD HIV+                  |                                          |                                          |                                        |                                           |                                           |
| Genu                     | 1.20 (.29)                               | .693 (.047)                              | 1.256 (.575)                           | .837 (.097)                               | .675 (.160)                               |
| Body                     |                                          | .789 (.0336)                             | 1.113 (.478)                           | .853 (.071)                               | .693 (.161)                               |
| Splenium                 |                                          | .717 (.000023)                           | 1.284 (.660)                           | .740 (.063)                               | .614 (.155)                               |
| AD CNTL                  |                                          |                                          |                                        |                                           |                                           |
| Genu                     | 1.56 (.25)                               | 1.468 (.0536)                            | 1.650 (.556)                           | 1.425 (.202)                              | 1.425 (.202)                              |
| Body                     |                                          | 1.582 (.0557)                            | 1.456 (.491)                           | 1.431 (.167)                              | 1.431 (.167)                              |
| Splenium                 |                                          | 1.595 (.0625)                            | 1.715 (.629)                           | 1.429 (.169)                              | 1.429 (.169)                              |
| AD HIV+                  |                                          |                                          |                                        |                                           |                                           |
| Genu                     | 1.70 (.27)                               | 1.478 (.0583)                            | 1.730 (.591)                           | 1.524 (.185)                              | 1.292 (.313)                              |
| Body                     |                                          | 1.606 (.0403)                            | 1.539 (.569)                           | 1.520 (.164)                              | 1.279 (.286)                              |
| Splenium                 |                                          | 1.586 (.0484)                            | 1.877 (.701)                           | 1.530 (.140)                              | 1.283 (.340)                              |
| RD CNTL                  |                                          |                                          |                                        |                                           |                                           |
| Genu                     | .75 (.30)                                | .288 (.0369)                             | .922 (.577)                            | .437 (.116)                               | .437 (.116)                               |
| Body                     |                                          | .349 (.0353)                             | .829 (.385)                            | .493 (.119)                               | .493 (.119)                               |
| Splenium                 |                                          | .279 (.0286)                             | .787 (.595)                            | .355 (.119)                               | .355 (.119)                               |
| RD HIV+                  |                                          |                                          |                                        |                                           |                                           |
| Genu                     | .97 (.32)                                | .301 (.0485)                             | 1.018 (.609)                           | .494 (.105)                               | .367 (.102)                               |
| Body                     |                                          | .380 (.0418)                             | .899 (.469)                            | .515 (.094)                               | .400 (.112)                               |
| Splenium                 |                                          | .283 (.0245)                             | .987 (.687)                            | .350 (.055)                               | .422 (.104)                               |

**Note:**—HIV + indicates seropositive; CNTL, seronegative participant.

**On-line Table 4: Longitudinal clinical data including viral load (No. of copies/mL) and CD4 (cells/uL) measured prior to initiation of cART and at 3 and 6 months after the initiation of cART<sup>a</sup>**

| Participant | Visit      | Viral Load | CD4 | Age (yr) |
|-------------|------------|------------|-----|----------|
| 1           | Start cART | 7015       | 600 | 30       |
|             |            | —          | —   |          |
| 2           | Start cART | 5124       | 283 | 26       |
|             | Month 3    | <75        | 402 |          |
|             | Month 6    | 3423       | 359 |          |
| 3           | Start cART | >500,000   | 126 | 23       |
|             | Month 3    | <75        | 305 |          |
|             | Month 6    | <75        | 458 |          |
| 4           | Start cART | 265,071    | 73  | 22       |
|             | Month 3    | 22,149     | 149 |          |
|             | Month 6    | 112        | 231 |          |
| 5           | Start cART | 185,966    | 5   | 43       |
|             | Month 3    | <75        | 88  |          |
|             | Month 6    | <75        | 106 |          |
| 6           | Start cART | <75        | 187 | 40       |
|             | Month 3    | <75        | 257 |          |
|             | Month 6    | <75        | 384 |          |
| 7           | Start cART | 7366       | 386 | 48       |
|             | Month 3    | <75        | 672 |          |
|             | Month 6    | <20        | 954 |          |
| 8           | Start cART | 11,655     | 369 | 22       |
|             | Month 3    | <75        | 377 |          |
|             | Month 6    | <20        | 418 |          |
| 9           | Start cART | 95,304     | 270 | 25       |
|             | Month 3    | <75        | —   |          |
|             | Month 6    | <20        | 485 |          |
| 10          | Start cART | 1360       | 815 | 28       |
|             | Month 3    | <20        | 668 |          |
|             | Month 6    | <20        | 969 |          |

**Note:**— indicates not obtained.

<sup>a</sup> Viral load decreased ( $P < .001$ ), CD4 cell count increased ( $P < .001$ ), and CD4/CD8 ratio was unchanged ( $P = .48$ ). While compliance with therapy was assessed at each site visit, our data suggest that 2 participants did not adhere to their medication regimen. One had a viral load of <75 at 3 months and a viral load of 3423 at 6 months. For the other, a viral load of 1439 was seen at 2 weeks, indicating therapeutic response. However, at 3 months, the viral load had increased to 22,149.

**On-line Table 5: Scores on various tests<sup>a</sup>**

| Test                             | Subject 2 | Subject 3 | Subject 4 | Subject 5 | Subject 6 | Subject 7 | Subject 8 | Subject 9 |
|----------------------------------|-----------|-----------|-----------|-----------|-----------|-----------|-----------|-----------|
| IHDS                             | 11        | 11        | 11        | 12        | 12        | 10.5      | 12        | 11        |
| Motor Speed                      | 4         | 4         | 3         | 4         | 4         | 4         | 4         | 4         |
| Psychomotor Speed                | 4         | 4         | 4         | 4         | 4         | 4         | 4         | 4         |
| Memory Recall                    | 3         | 3         | 4         | 4         | 4         | 2.5       | 4         | 3         |
| HVLT                             |           |           |           |           |           |           |           |           |
| Total Recall                     | 24 (36)   | 20 (25)   | 24 (37)   | 26 (43)   | 26 (43)   | 27 (44)   | 26 (41)   | 24 (35)   |
| Retention (% retained)           | 83        | 92        | 100       | 100       | 100       | 100       | 100       | 100       |
| Recognition Discrimination Index | 10        | 9         | 12        | 12        | 12        | 12        | 12        | 9         |
| HIV Dementia Motor Scale         | 0         | 0         | 0         | 0         | 0         | 0         | 0         | 2         |
| Strength                         | 0         | 0         | 0         | 0         | 0         | 0         | 0         | 0         |
| Tone                             | 0         | 0         | 0         | 0         | 0         | 0         | 0         | 0         |
| Reflexes                         | 0         | 0         | 0         | 0         | 0         | 0         | 0         | 0         |
| Coordination                     | 0         | 0         | 0         | 0         | 0         | 0         | 0         | 1         |
| Gait                             | 0         | 0         | 0         | 0         | 0         | 0         | 0         | 1         |
| UPDRS Motor Scale                | 3         | 1         | 1         | 0         | 1         | 0         | 0         | 4         |
| Grooved Pegboard Test            |           |           |           |           |           |           |           |           |
| Dominant hand (sec)              | 63 (55)   | 57 (62)   | 84 (42)   | 55 (61)   | 67 (53)   | 49 (66)   | 73 (44)   | 72 (45)   |
| Nondominant hand (sec)           | 63 (61)   | 59 (64)   | 83 (47)   | 55 (66)   | 72 (52)   | 54 (62)   | 85 (40)   | 71 (53)   |

**Note:**—IHDS indicates International HIV Dementia Screen; HVLT, Hopkins Verbal Learning Test; UPDRS, Unified Parkinson's Disease Rating Scale.

<sup>a</sup> T-scores are in parentheses next to raw scores for the HVLT and Grooved Pegboard.
